# Supplementary material for: Isolation and identification of a potential unknown impurity in montelukast drug substance resulting from photolytic degradation
Source: Royal Society of Chemistry journal article supplement (doi:10.1039/c5ay02806j), 2016-01-01

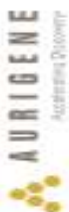

CTO-3 MET/02515002/012

AR.No: ME0315/285

Analyt : NARESH B  
Solvent : DMSO  
Date : Mar 4 2015  
NUCLEUS : C13  
PQ (MHz) : 100.65  
EXP : CARBON

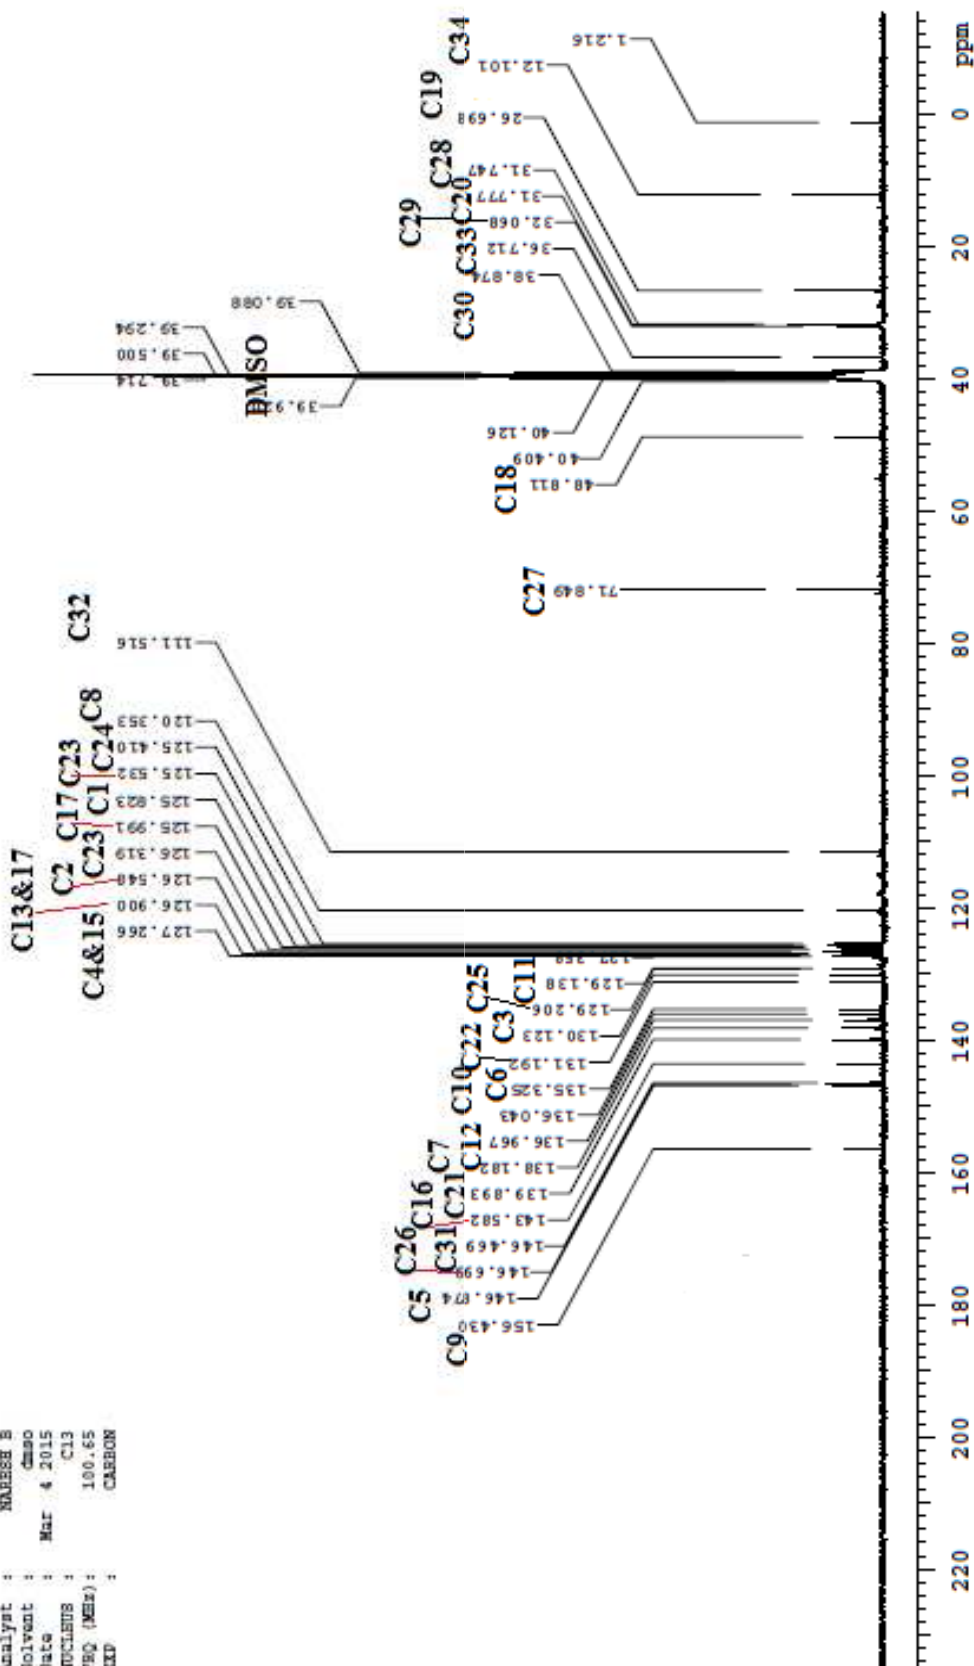

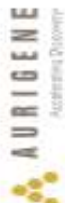

CTO-3 MELT/02515002/012  
AN.No: MB0315/285  
Analyst : NARESH B  
Solvent : DMSO  
Date : Mar 4 2015  
NUCLEUS : C13  
PFG (MHz) : 100.65  
EXD : CARBON

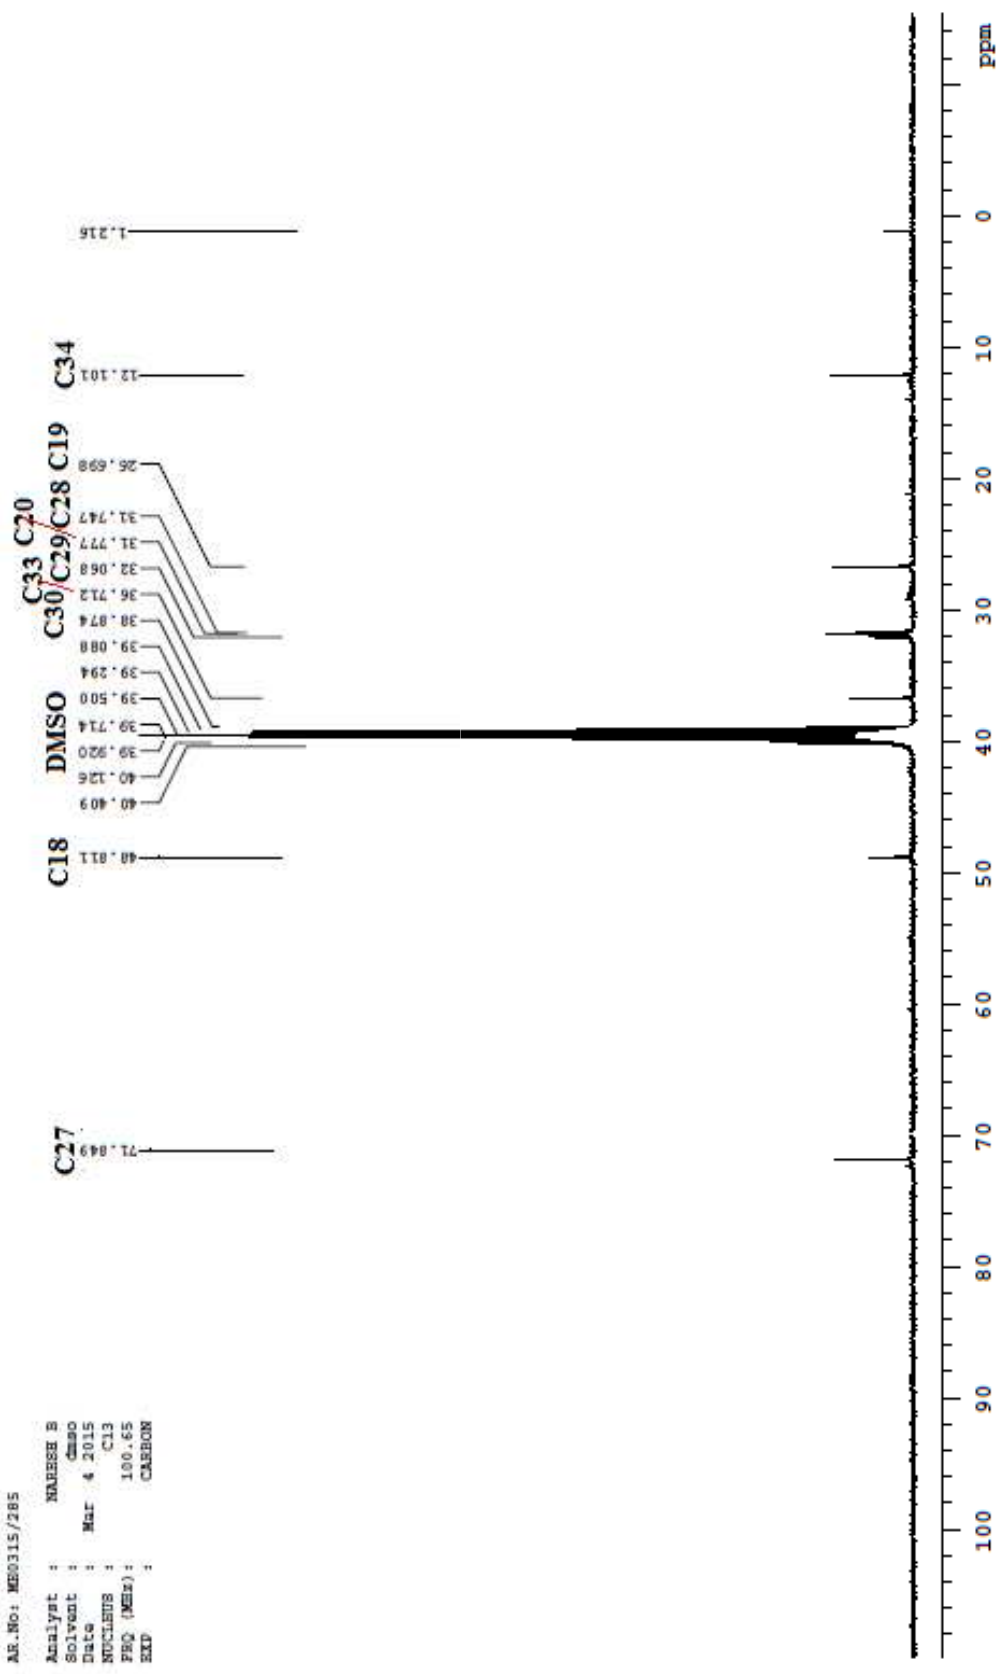

CTO-3 MET/02515002/012

AR.No: ME0315/285

Analyst : NARESH B  
Solvent : CDCl<sub>3</sub>  
Date : Mar 4 2015  
NUCLEUS : C13  
PQC (MHz) : 100.65  
EXP : CARBON

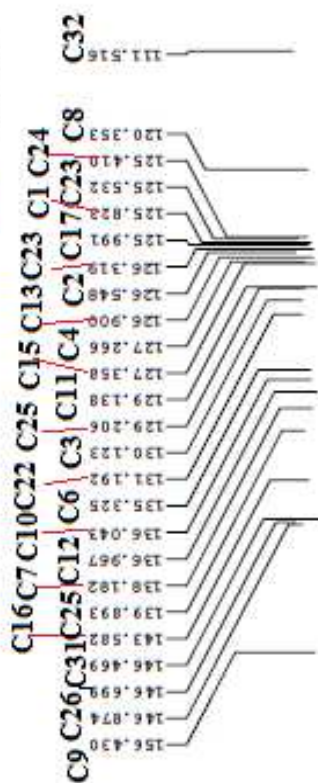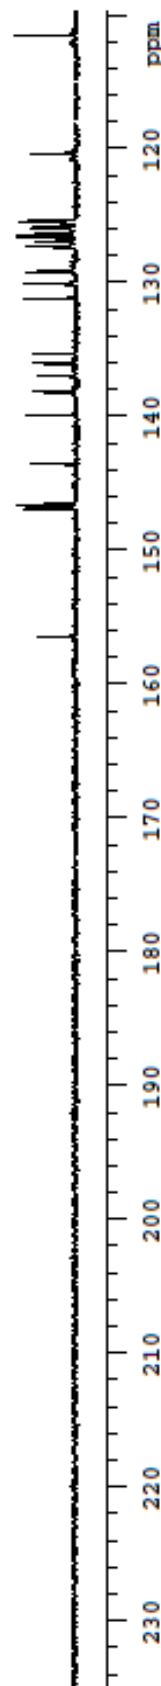

Supplement: c5ay02806j1.pdf [file c5ay02806j1.pdf]
