# Supplementary material for: Isolation and identification of a potential unknown impurity in montelukast drug substance resulting from photolytic degradation
Source: Royal Society of Chemistry journal article supplement (doi:10.1039/c5ay02806j), 2016-01-01
Supplement: c5ay02806j8.pdf [file c5ay02806j8.pdf]

PerkinElmer Spectrum ES Version 10.03.08  
Wednesday, April 15, 2015 6:10 PM

**Dr.Reddy's Laboratories Ltd, CTO UNIT-3 TP LAB**  
INSTRUMENT ID:TP-040

**Sample Report**

Numbers of Scans: 4  
Resolution: 4  
Spectra path name: D:\FTIR DATA new\MARCH-2015\04015030009\_1\_1.sp  
Date created: 04/03/15 14:09:20

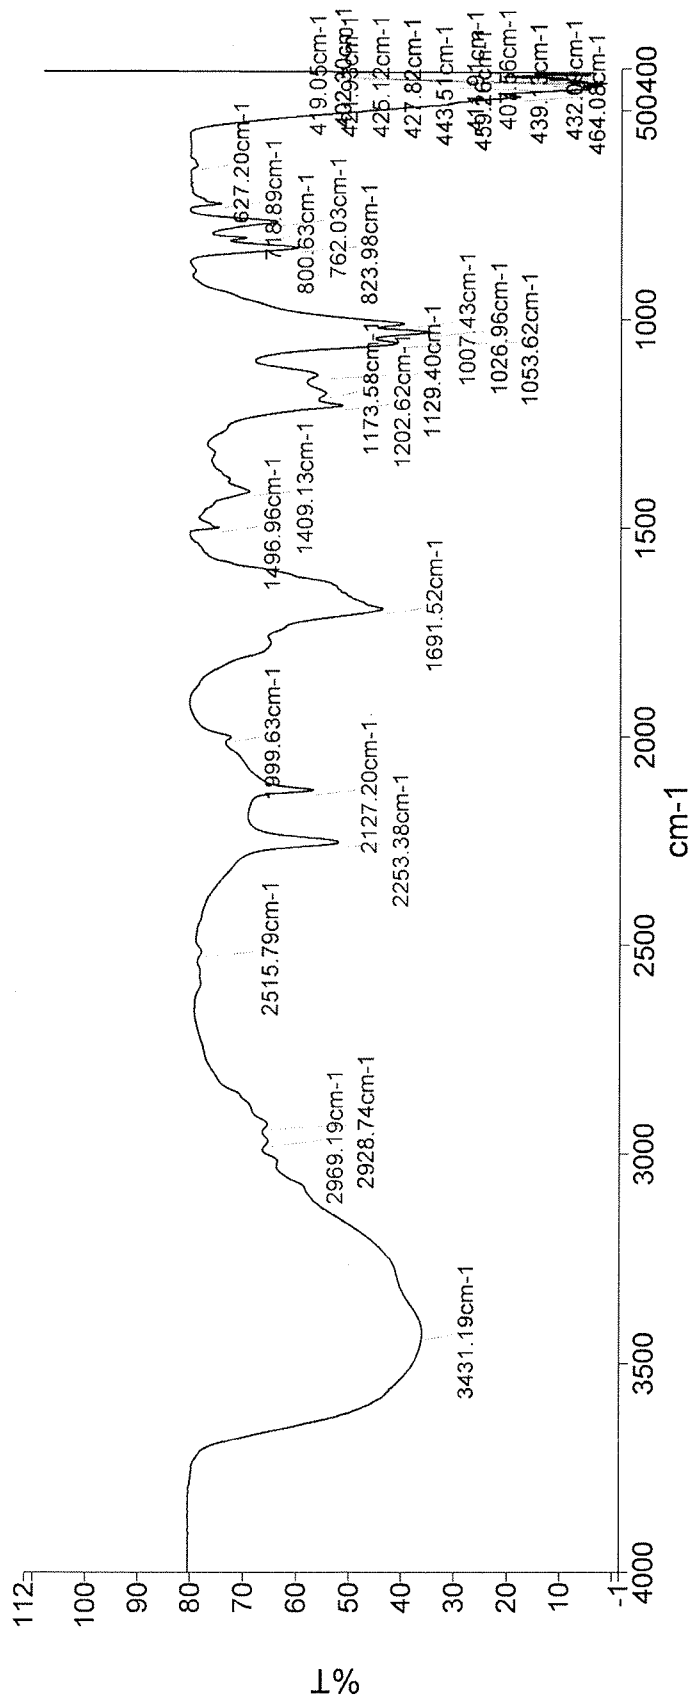

Sample Name: 04015030009\_1\_1  
Sample Description: MLT1/02515002/012

Analyzed By: *[Signature]*  
Analysed Date: 15/04/15  
Checked By:  
Checked Date:
