# Supplementary material for: Isolation and identification of a potential unknown impurity in montelukast drug substance resulting from photolytic degradation
Source: Royal Society of Chemistry journal article supplement (doi:10.1039/c5ay02806j), 2016-01-01
Supplement: c5ay02806j9.pdf [file c5ay02806j9.pdf]

PentInElmer Spectrum ES Version 10.00.08  
Tuesday, January 20, 2015 10:19 AM

**Dr.Reddy's Laboratories Ltd, CTO UNIT-3 TP LAB**  
INSTRUMENT ID:TP-040

**Sample Report**

Numbers of Scans: 4  
Resolution: 4  
Spectra path name: D:\FTIR DATA\new\JAN-2015\04015010036\_1\_1.sp  
Date created: 20/01/15 10:18:29

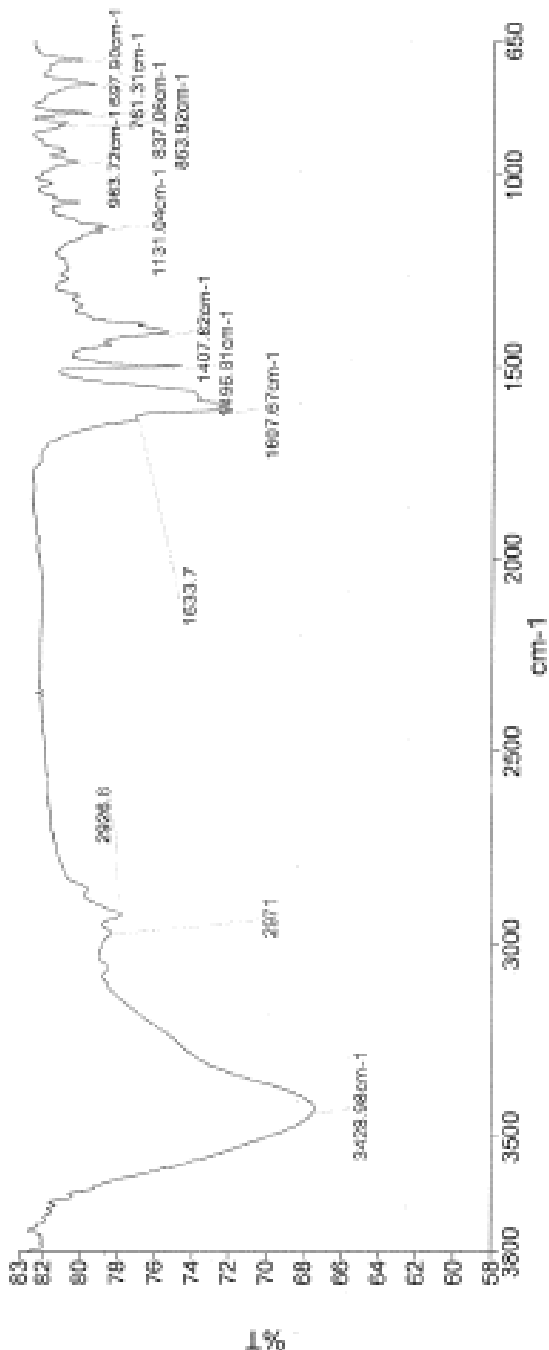

Sample Name: 04015010036\_1\_1  
Sample Description: PMSM/T-200

Analyzed By: *[Signature]*  
Checked By: *[Signature]*  
Checked Date: 21/01/15

*[Handwritten Signature]*  
21/01/15
