# Supplementary material for: Isolation and identification of a potential unknown impurity in montelukast drug substance resulting from photolytic degradation
Source: Royal Society of Chemistry journal article supplement (doi:10.1039/c5ay02806j), 2016-01-01
Supplement: c5ay02806j10.pdf [file c5ay02806j10.pdf]

INSTALLATION OF TT 4600

Dr. REDDY's LAB

Printing Date: February 23, 2015

CHARACTERISATION LAB

Printing Time: 2:42:17 PM

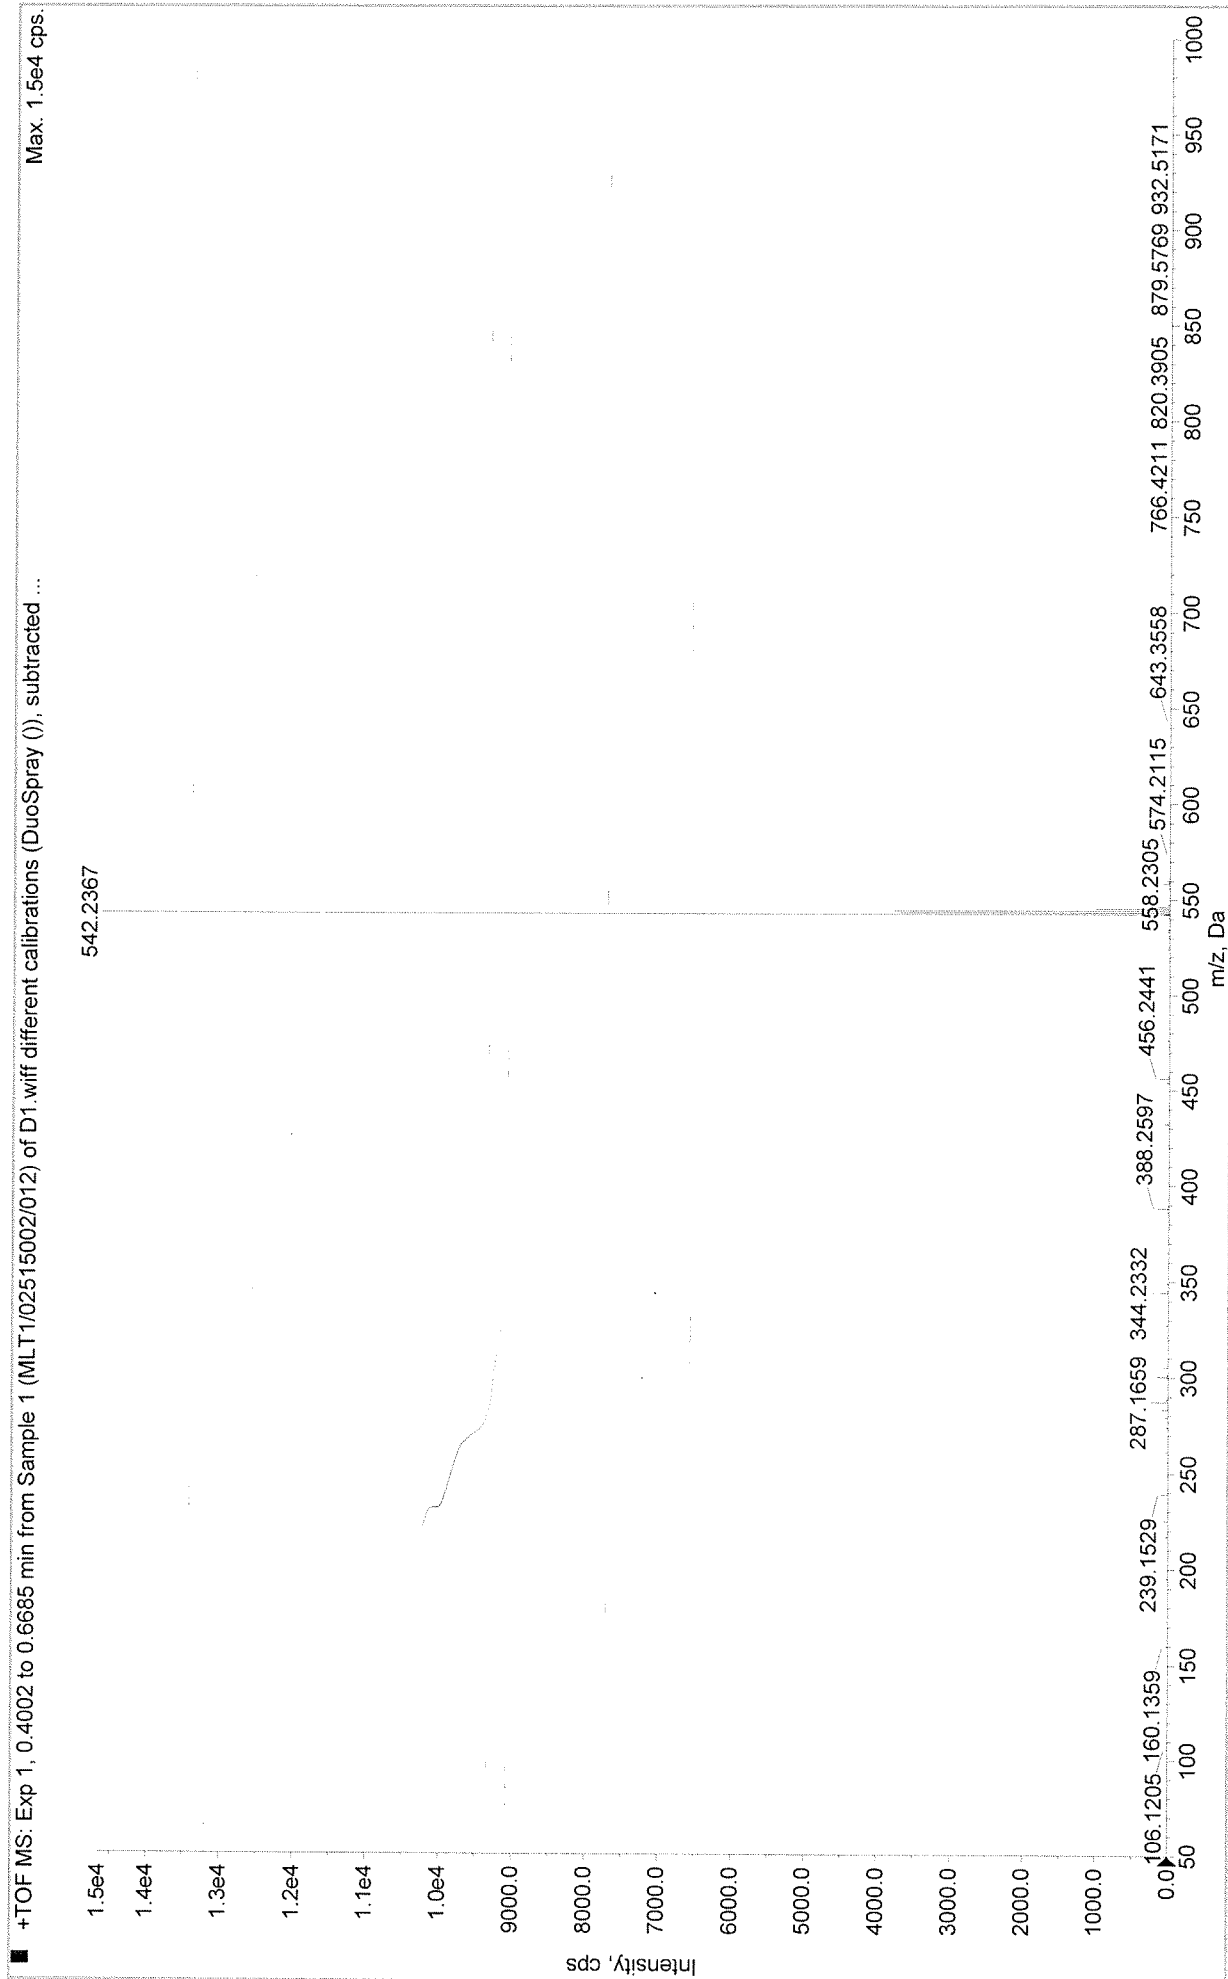

PERFORMED BY :

REVIEWED BY :
