# Supplementary figures and images for: Isolation and identification of a potential unknown impurity in montelukast drug substance resulting from photolytic degradation
Source: Royal Society of Chemistry journal article supplement (doi:10.1039/c5ay02806j), 2016-01-01

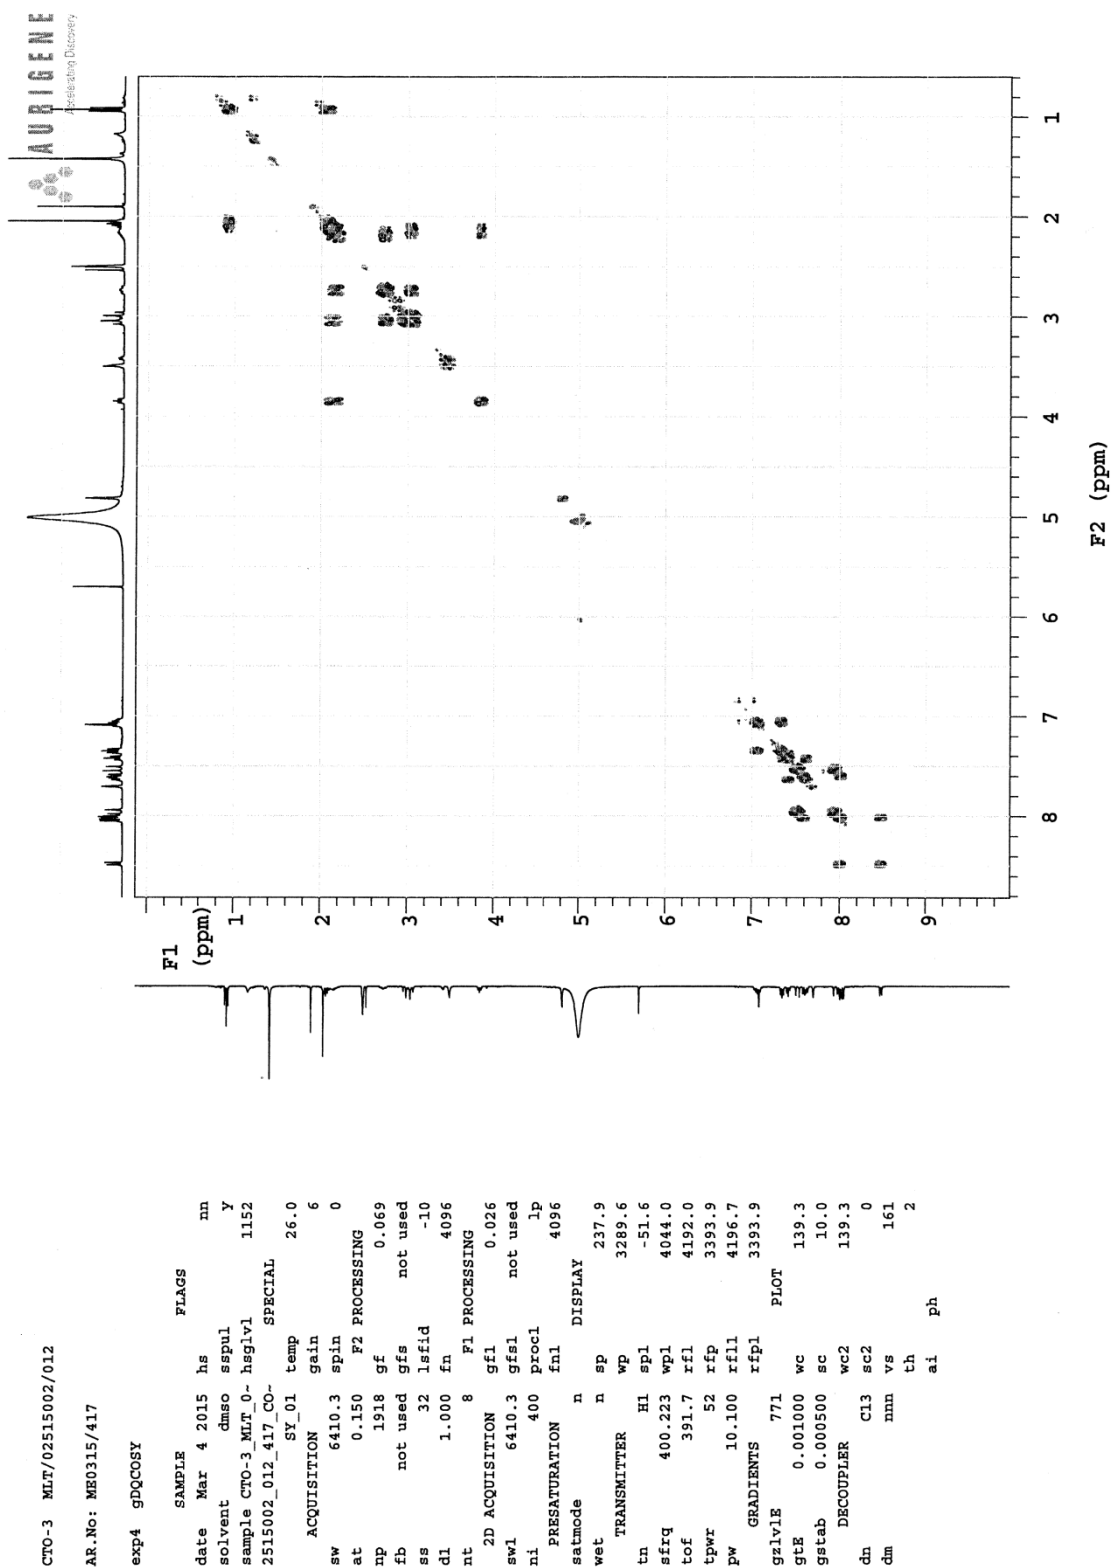

CTO-3 MLT/02515002/012

AR.No: ME0315/417

NUCLEUS : H1  
FRQ (MHz) : 400.22  
EXP : gDQCOSY

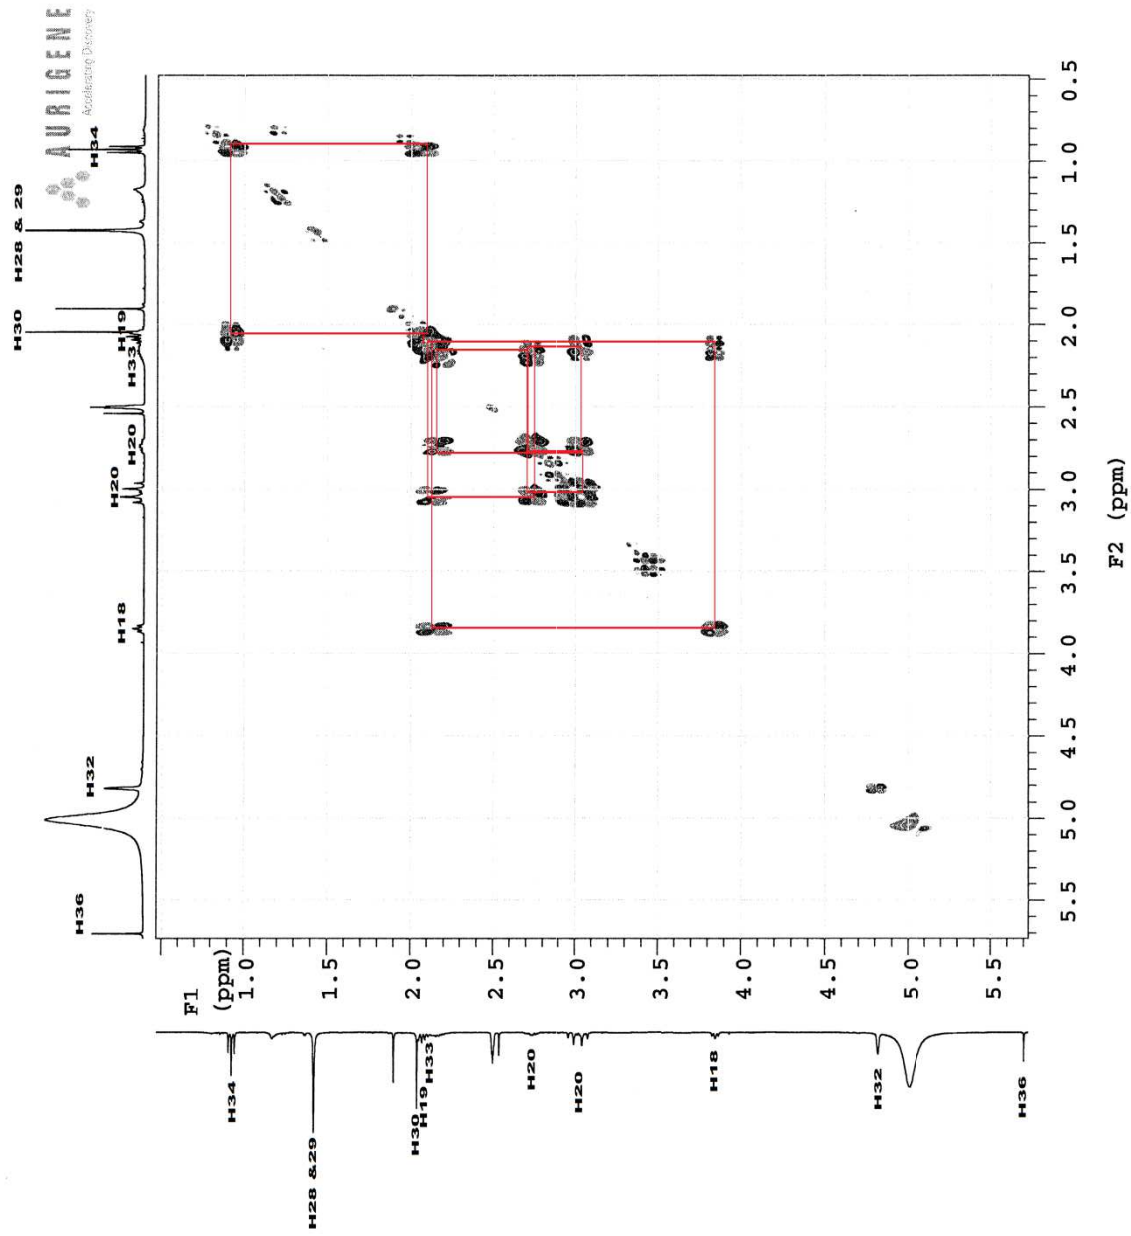

CTO-3 MLT/02515002/012  
AR.No: ME0315/417

NUCLEUS : H1  
PRQ (MHz): 400.22  
EXP : gDQCOSY

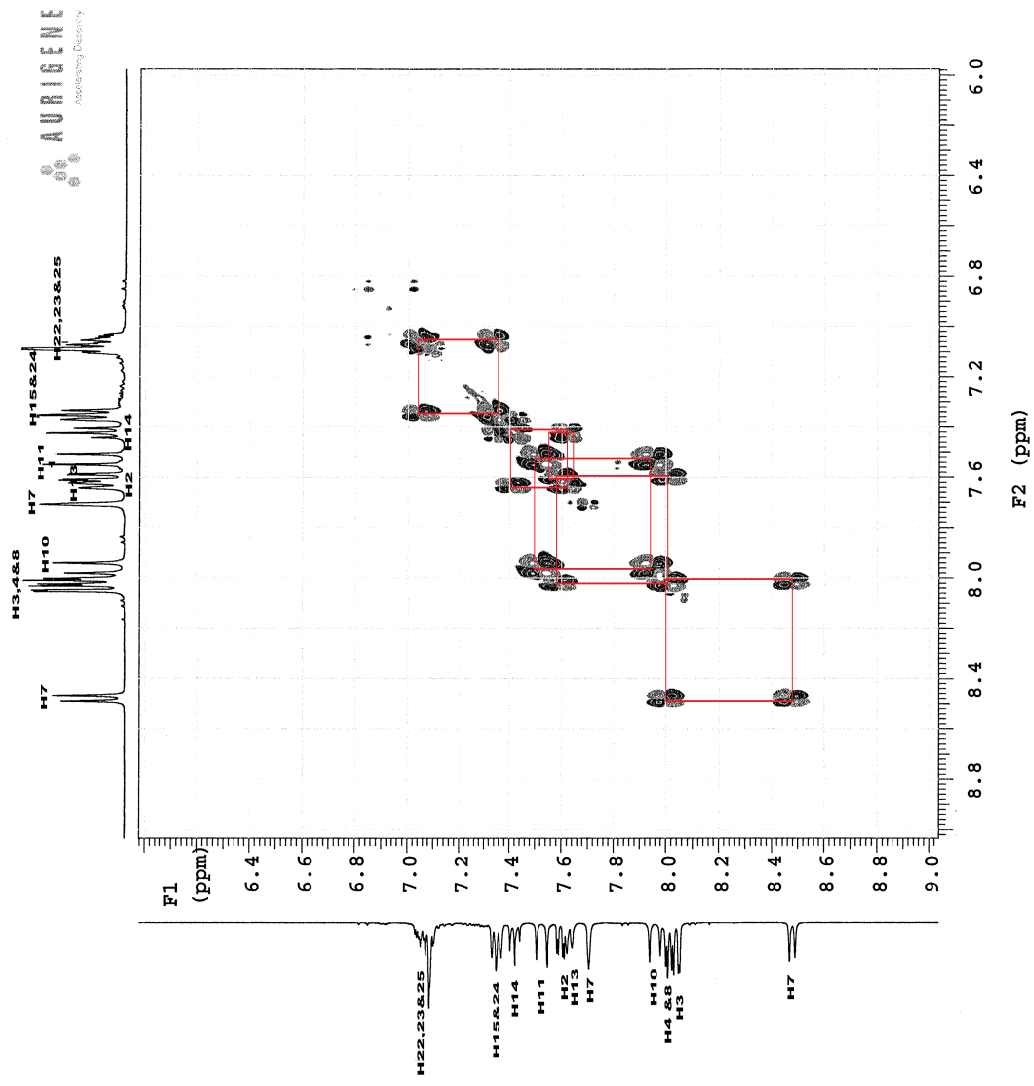

Supplement: c5ay02806j6.pdf [file c5ay02806j6.pdf]
